# Supplementary material for: Integrin α5 promotes migration and invasion through the FAK/STAT3/AKT signaling pathway in icotinib-resistant non-small cell lung cancer cells
Source: PubMed Central journal article supplement — Oncol Lett. 2021 May 24;22(1):556. doi: 10.3892/ol.2021.12817 (PMC8161469; doi:10.3892/ol.2021.12817), 2021-05-24

Figure S1. Resistance of resistant cells to gefitinib, and protein expression after icotinib, siRNA and Stattic treatments. (A) Cell viability was measured using MTT in parent cells (HCC827 and PC9) and resistant cells (827/IcoR and PC9/IcoR) treated with gefitinib for 48 h. (B) Expression level of p-EGFR in parent and resistant cells treated with or without icotinib examined using western blotting. (C) Protein expression of integrin  $\beta$ 4 in integrin  $\alpha$ 5-knockdown 827/IcoR and PC9/IcoR cells. (D) Western blotting of p-STAT3, p-FAK and p-AKT in 827/IcoR and PC9/IcoR cells treated with Stattic. \*P<0.05 and \*\*P<0.01. p-, phosphorylated; IcoR, icotinib-resistant; FAK, focal adhesion kinase; n.s., not significant.

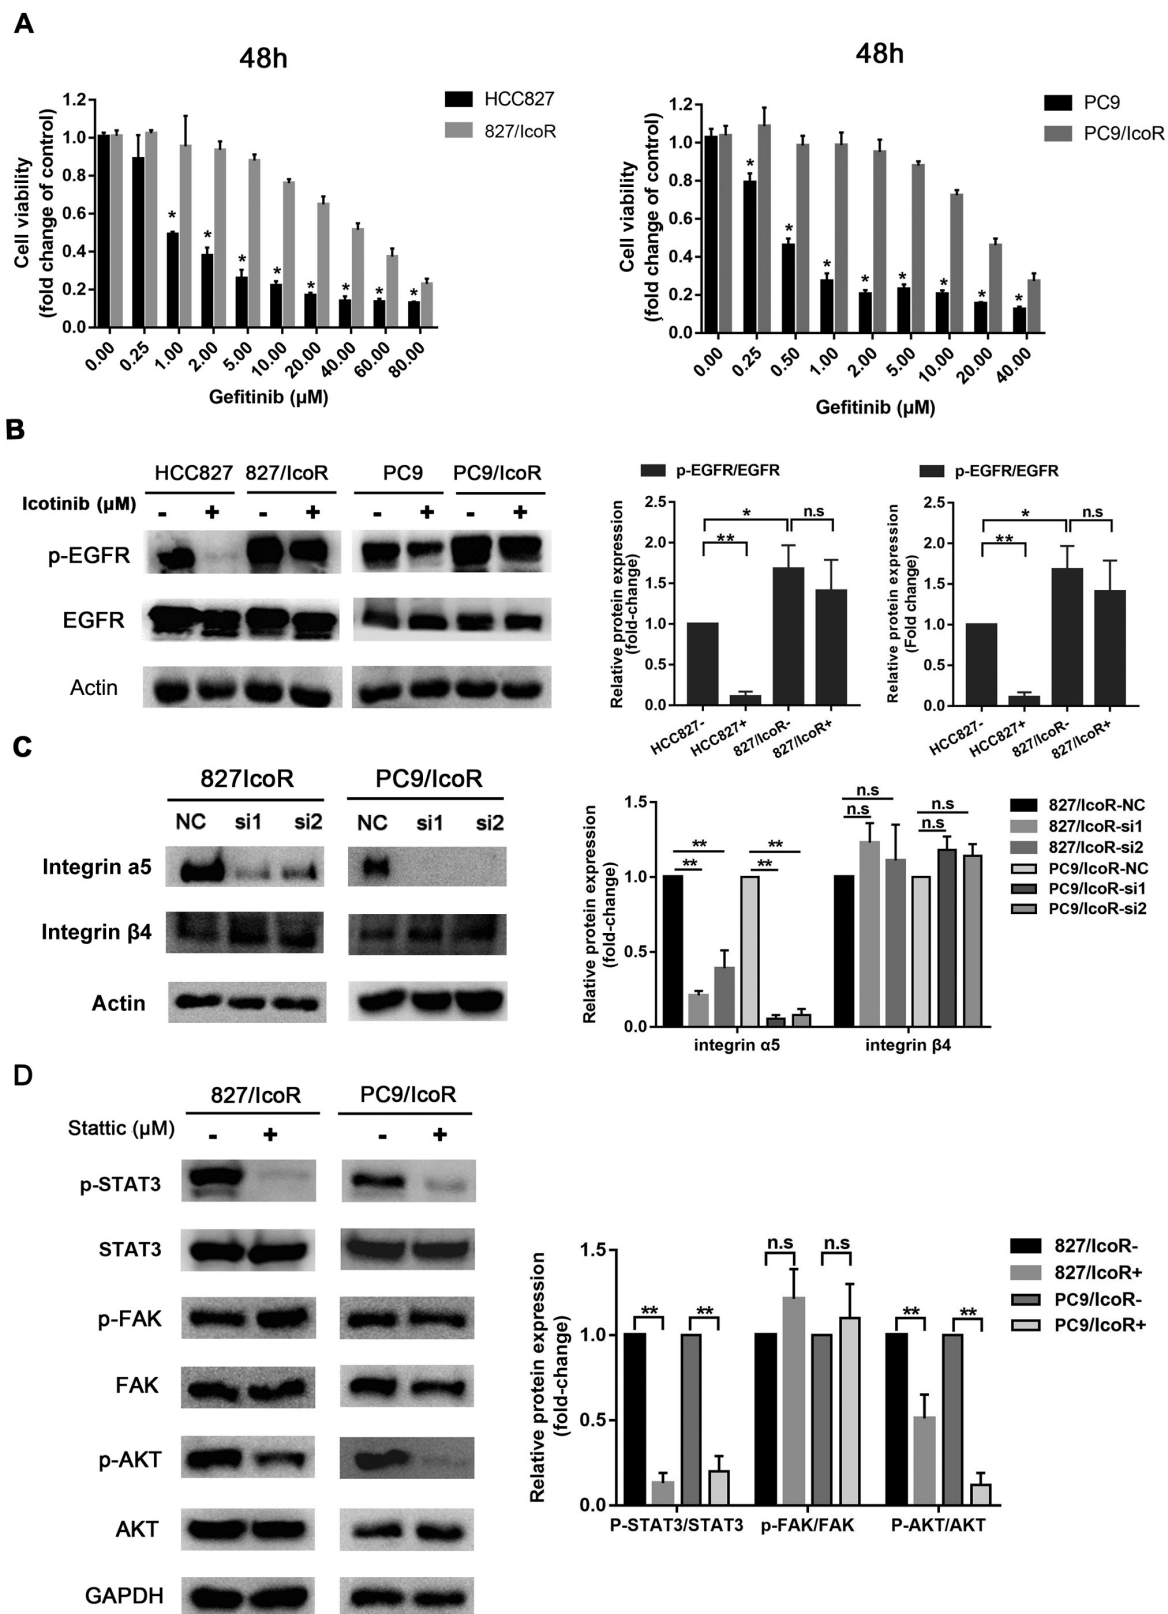

Supplement: Supplementary_Data.pdf [file Supplementary_Data.pdf]
